# Supplementary material for: Parental Decision Making Regarding Level of Newborn Screening Participation in the Homebirth Setting
Source: Research Square preprint supplement (doi:10.21203/rs.3.rs-6882053/v1), 2025-06-20
Supplement: Supplementary file 1 [file 89b81eee3293459490bd379d.docx]

**Newborn Screening Interview Codebook**

**Parental Decision Making Regarding Level of Newborn Screening Participation in the Homebirth Setting**

Dylan Platt1, 2, MS, CGC, Mackenzie Ikenberry3, MS, CGC, Becca Loman1, 2, MS, MS, CGC

1. Genetic Counseling, Augustana University, Sioux Falls, SD, USA
2. Sanford Health, Sioux Falls, SD, USA
3. Ascension Sacred Heart Hospital, Pensacola, FL, USA

***Intended Journal:*** *Journal of Community Genetics*

**Corresponding Author:** Dylan Platt; 1321 W 22nd St. Sioux Falls, SD 57105; 303.550.1875; [dplatt@augie.edu](mailto:dplatt@augie.edu); [dylan.platt@sanfordhealth.org](mailto:dylan.platt@sanfordhealth.org)

**Domain: Brith Setting**

Home Birth/

Positive (statements of enthusiasm about the setting)

Negative (statements of poor experiences)

Cost (attitudes regarding the cost of birth in specific setting)

Safety (statements regarding the safety of the setting)

Limitations (statements regarding limitations of a particular setting)

Motivations (reasons for picking this setting over others)

Covid

Past negative experience (negative experience with the medical/hospital setting)

Past positive experience (positive experience with home birth)

Hospital or Birth Center/

Positive (statements of enthusiasm about the setting)

Negative (statements of poor experiences)

Cost (attitudes regarding the cost of birth in specific setting)

Safety (statements regarding the safety of the setting)

Limitations (statements regarding limitations of a particular setting)

Motivations (reasons for picking this setting over others)

**Domain: Birth Plan**

Change from birth plan (alteration from what the individual had intended for their child’s birth)

Participants/

Midwife

Doula

Physician

Family

Natural birth (statements regarding the ‘naturalness’ of a particular birth setting/practice)

**Domain: Newborn Screen**

Declined (participant declined any part of the NBS process)

Complete (all components completed)

Partial (not all components completed, but at least some)

Inappropriate timing (at least one component of the NBS was completed outside of the

recommended time window)

Appropriate timing (components of the NBS that were completed, if any, adhered to expected

time frame)

Concerns/

Consent (conversation occurring prior to action taking place)

Overreach (concerns regarding what a sample is being used for)

Personal Belief (concerns that the testing does not fit within their personal beliefs)

Completeness (fear of missing something if the test is not completed)

Offered (NBS was offered at some point)

Perceived utility (statements indicating the person feels that NBS offers beneficial information)

Patient Questions (questions that the individual had for their provider)

Setting/

At-Home (full NBS was available within the home setting)

Outside of home (full NBS was available outside of the home)

Combination (full NBS required components to be completed both inside and outside of

the home)

Required (or at least perceived to be required by state or institution)

Risk vs. benefit

Science literacy (feel comfortable with understanding and purpose of screen)

Cost (low or no cost was encouraging or high cost was discouraging)

**Domain: Misconceptions**

Family History (incorrect interpretation about the reason for NBS, based off family history)

General

**Domain: Education**

Healthcare Provider (HCP provided education about NBS)

Literature (information about NBS was learned from literature sources)

Family (family or friends informed the participant about the NBS)

Social Media (blogs, facebook)

Recall (can”t remember)
