# Supplementary material for: Parental Decision Making Regarding Level of Newborn Screening Participation in the Homebirth Setting
Source: Research Square preprint supplement (doi:10.21203/rs.3.rs-6882053/v1), 2025-06-20
Supplement: Supplementary file 2 [file ad8c1fb01277d9b0d5138981.docx]

**Parental Decision Making Regarding Level of Newborn Screening Participation in the Homebirth Setting**

Dylan Platt1, 2, MS, CGC, Mackenzie Ikenberry3, MS, CGC, Becca Loman1, 2, MS, MS, CGC

1. Genetic Counseling, Augustana University, Sioux Falls, SD, USA
2. Sanford Health, Sioux Falls, SD, USA
3. Ascension Sacred Heart Hospital, Pensacola, FL, USA

***Intended Journal:*** *Journal of Community Genetics*

**Corresponding Author:** Dylan Platt; 1321 W 22nd St. Sioux Falls, SD 57105; 303.550.1875; [dplatt@augie.edu](mailto:dplatt@augie.edu); [dylan.platt@sanfordhealth.org](mailto:dylan.platt@sanfordhealth.org)

**Semi-structured Interview script/questions:**

Interviewer introduces themself.

Thank you for taking the time to talk with me today.

-->Acquire verbal consent to participate in the interview and be recorded. (verbal confirmation that informed consent document has been read)

-->Begin recording

Introduction from interviewer: In this interview, I’d like to ask you some questions about your personal experience with homebirths and newborn screening. For the questions asking about your experiences and opinions, there are no right or wrong answers. Our study is just hoping to get a better understanding of factors that go into these decisions. Do you have any questions for me before we start? Are you ready to begin?

Start here If applicable based upon online survey response: (*If not, skip next 2 questions*)

1. Would you categorize your hospital birth experience(s) as positive, negative, or neutral?

2. Do you recall if newborn screening was done during your hospital birth(s)?

3. How many homebirths have you had?

4. Would you mind telling me a bit about your homebirth experience(s)?

5. Would you categorize your homebirth experience(s) as positive, negative, or neutral?

6. What factors motivated you to pursue a homebirth(s)?

7. How familiar would you say you are with newborn screening?

8. In your own words could you describe newborn screening?

9. What would you describe is the purpose of newborn screening?

( I*f already addressed in #8, replace with: Do you feel like there is utility in this screening?*

*Is this something that you feel like doesn’t have utility for yourself and your family or everyone at large?*)

10. How did you learn or hear about newborn screening?

11. Have you ever received a positive newborn screening result for any of your children?

12. You reported on the pre-survey that you were given the option to participate or opt out of NBS, I’d love to hear how that conversation went and who discussed this option with you.

13. Do you recall if all 3 components of newborn screening were available to you?

14. Did you participate in or opt-out of newborn screening during your homebirth(s)?

15. (*If multiple homebirths*): Did you choose the same for each birth?

16. (*If only 1 homebirth*): If you were to have another pregnancy/homebirth, would you make the same decision regarding NBS as your previous homebirth?

17. Did you choose to have any component of newborn screening done at a later point in time in a pediatric setting? (heel stick for blood spot, pulse oximetry for congenital heart defects, hearing test for hearing loss)

-->If yes, how old was your baby when newborn screening was completed?

18. What factors contributed to you opting-out of newborn screening? (*If answer includes multiple factors, proceed to question 19, skip if not.*)

19. If you had to choose one of those factors as a primary reason for opting out, which would that be?

20. Did you feel pressured by anyone to choose one way or the other?
